# Supplementary figures and images for: Characterization of the Protective Cellular Immune Response in Pigs Immunized Intradermally with the Live Attenuated African Swine Fever Virus (ASFV) Lv17/WB/Rie1
Source: MDPI journal article supplement (doi:10.3390/vaccines12040443), 2024-04-20

# Supplementary Figure S1

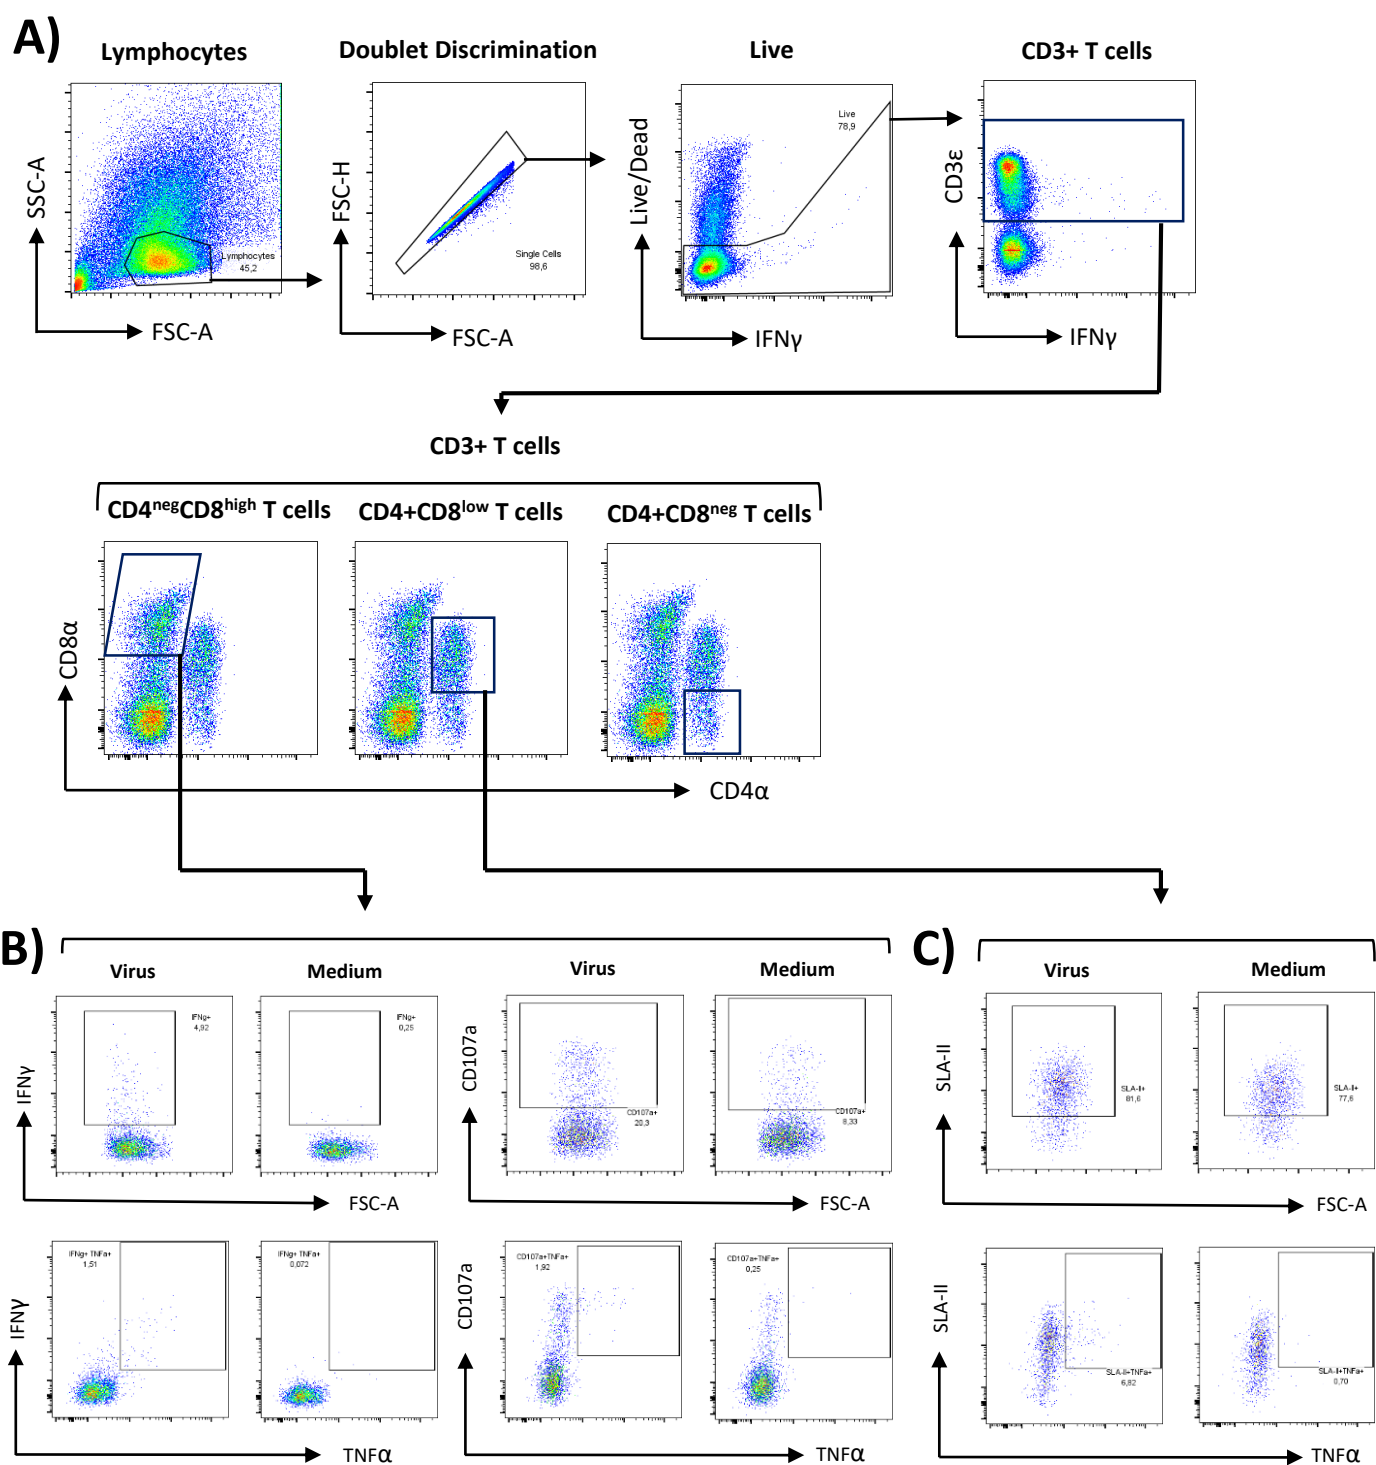

Supplement: s1 [file s1]
